# Supplementary material for: Alteration of glycosylation in serum proteins: a new potential indicator to distinguish non-diabetic renal diseases from diabetic nephropathy
Source: PubMed Central journal article supplement — RSC Adv. 2018 Nov 19;8(68):38872–82. doi: 10.1039/c8ra06832a (PMC9090655; doi:10.1039/c8ra06832a), 2018-11-19
Supplement: RA-008-C8RA06832A-s001.pdf [file RA-008-C8RA06832A-s001.pdf]

**Table. S1 The normalized fluorescent intensities for each lectin in DN and four NDRD groups by the lectin microarray analysis based on data of 37**

lectins<sup>a</sup>

| Lectin  | Specificity of lectin                                                                                                                                    | DN            | NDRD          |               |               |               |
|---------|----------------------------------------------------------------------------------------------------------------------------------------------------------|---------------|---------------|---------------|---------------|---------------|
|         |                                                                                                                                                          |               | MN            | MPGN          | IgAN          | FSGS          |
| Jacalin | Galβ1-3GalNAcα-Ser/Thr(T), GalNAcα-Ser/Thr(Tn), GlcNAcβ1-3-GalNAcα-Ser/Thr(Core3), sialyl-T(ST). not bind to Core2, Core6, and sialyl-Tn (STn)           | 0.033 ± 0.019 | 0.063 ± 0.014 | 0.062 ± 0.022 | 0.046 ± 0.007 | 0.035 ± 0.003 |
| ECA     | Galβ-1,4GlcNAc (type II), Galβ1-3GlcNAc (type I)                                                                                                         | 0.025 ± 0.012 | 0.029 ± 0.009 | 0.016 ± 0.003 | 0.029 ± 0.003 | 0.011 ± 0.002 |
| HHL     | High-Mannose, Manα1-3Man, Manα1-6Man, Man5-GlcNAc2-Asn                                                                                                   | 0.022 ± 0.010 | 0.022 ± 0.003 | 0.014 ± 0.005 | 0.026 ± 0.003 | 0.012 ± 0.001 |
| WFA     | terminating in GalNAcα/β1-3/6Gal                                                                                                                         | 0.012 ± 0.005 | 0.031 ± 0.010 | 0.016 ± 0.003 | 0.020 ± 0.002 | 0.007 ± 0.002 |
| GSL-II  | GlcNAc and α- or β-linked N-acetylglucosamine residues on the nonreducing terminal of oligosaccharides, agalacto-type, tri- or tetra-antennary N-glycans | 0.013 ± 0.006 | 0.015 ± 0.009 | /             | 0.017 ± 0.002 | 0.003 ± 0.003 |
| MAL-II  | Siaα2-3Galβ1-4Glc(NAc)/Glc, Siaα2-3Gal, Siaα2-3, Siaα2-3GalNAc                                                                                           | 0.021 ± 0.010 | 0.028 ± 0.012 | 0.014 ± 0.004 | 0.035 ± 0.002 | 0.009 ± 0.003 |
| PHA-E   | Bisecting GlcNAc, biantennary complex-type N-glycan with outer Gal                                                                                       | 0.021 ± 0.010 | 0.011 ± 0.009 | 0.013 ± 0.003 | 0.017 ± 0.002 | 0.010 ± 0.002 |

|        |                                                                                        |                   |                   |                   |                   |                   |
|--------|----------------------------------------------------------------------------------------|-------------------|-------------------|-------------------|-------------------|-------------------|
| PTL-I  | GalNAc, GalNAc $\alpha$ -1,3Gal, GalNAc $\alpha$ -1,3Gal $\beta$ -1,3/4Glc             | 0.010 $\pm$ 0.002 | 0.017 $\pm$ 0.008 | 0.006 $\pm$ 0.005 | 0.017 $\pm$ 0.005 | 0.006 $\pm$ 0.002 |
| SJA    | Terminal in GalNAc and Gal, anti-A and anti-B human blood group                        | 0.014 $\pm$ 0.007 | 0.015 $\pm$ 0.003 | 0.006 $\pm$ 0.005 | 0.018 $\pm$ 0.002 | 0.006 $\pm$ 0.002 |
| PNA    | Gal $\beta$ 1-3GalNAc $\alpha$ -Ser/Thr(T)                                             | 0.019 $\pm$ 0.010 | 0.017 $\pm$ 0.002 | 0.009 $\pm$ 0.001 | 0.019 $\pm$ 0.001 | 0.009 $\pm$ 0.002 |
| EEL    | Gal $\alpha$ 1-3(Fuca1-2)Gal (blood group B antigen)                                   | 0.029 $\pm$ 0.011 | 0.032 $\pm$ 0.005 | 0.020 $\pm$ 0.001 | 0.039 $\pm$ 0.004 | 0.020 $\pm$ 0.003 |
| AAL    | Fuca1-6 GlcNAc(core fucose), Fuca1-3(Gal $\beta$ 1-4)GlcNAc                            | 0.058 $\pm$ 0.023 | 0.028 $\pm$ 0.009 | 0.026 $\pm$ 0.002 | 0.031 $\pm$ 0.004 | 0.039 $\pm$ 0.010 |
| LTL    | Fuca1-3Gal $\beta$ 1-4GlcNAc, Fuca1-anti-H blood group specificity                     | 0.017 $\pm$ 0.008 | 0.014 $\pm$ 0.004 | 0.009 $\pm$ 0.002 | 0.037 $\pm$ 0.005 | 0.006 $\pm$ 0.005 |
| MPL    | Gal $\beta$ 1-3GalNAc, GalNAc                                                          | 0.024 $\pm$ 0.011 | 0.022 $\pm$ 0.005 | 0.015 $\pm$ 0.003 | 0.018 $\pm$ 0.002 | 0.004 $\pm$ 0.001 |
| LEL    | LacNAc and poly LacNAc                                                                 | 0.021 $\pm$ 0.010 | 0.015 $\pm$ 0.013 | 0.010 $\pm$ 0.009 | 0.024 $\pm$ 0.001 | 0.012 $\pm$ 0.002 |
| GSL-I  | $\alpha$ GalNAc, $\alpha$ Gal, anti-A and B                                            | 0.015 $\pm$ 0.004 | 0.022 $\pm$ 0.004 | 0.014 $\pm$ 0.003 | 0.019 $\pm$ 0.001 | 0.011 $\pm$ 0.002 |
| DBA    | $\alpha$ GalNAc, Tn antigen, GalNAc $\alpha$ 1-3((Fuca1-2))Gal (blood group A antigen) | 0.023 $\pm$ 0.012 | 0.016 $\pm$ 0.005 | 0.011 $\pm$ 0.001 | 0.016 $\pm$ 0.003 | 0.003 $\pm$ 0.002 |
| LCA    | Fuca-1,6GlcNAc, $\alpha$ -D-Glc                                                        | 0.036 $\pm$ 0.015 | 0.038 $\pm$ 0.001 | 0.032 $\pm$ 0.003 | 0.041 $\pm$ 0.003 | 0.050 $\pm$ 0.010 |
| RCA120 | $\beta$ -Gal, Gal $\beta$ -1,4GlcNAc (type II), Gal $\beta$ 1-3GlcNAc (type I)         | 0.033 $\pm$ 0.013 | 0.051 $\pm$ 0.023 | 0.087 $\pm$ 0.009 | 0.040 $\pm$ 0.005 | 0.056 $\pm$ 0.010 |

|        |                                                                                                                                                 |               |               |               |               |               |
|--------|-------------------------------------------------------------------------------------------------------------------------------------------------|---------------|---------------|---------------|---------------|---------------|
| STL    | trimers and tetramers of GlcNAc, core (GlcNAc) of N-glycan, oligosaccharide containing GlcNAc and MurNAc                                        | 0.015 ± 0.005 | 0.026 ± 0.008 | 0.022 ± 0.004 | 0.020 ± 0.001 | 0.012 ± 0.001 |
| BS-I   | α-Gal, α-GalNAc, Galα-1,3Gal, Galα-1,6Glc                                                                                                       | 0.005 ± 0.001 | 0.016 ± 0.003 | /             | 0.016 ± 0.004 | 0.014 ± 0.001 |
| ConA   | High-Mannose, Manα1-6(Manα1-3)Man, terminal GlcNAc                                                                                              | 0.042 ± 0.021 | 0.043 ± 0.010 | 0.110 ± 0.007 | 0.036 ± 0.006 | 0.012 ± 0.002 |
| PTL-II | Gal, blood group H, T-antigen                                                                                                                   | 0.009 ± 0.004 | 0.031 ± 0.003 | 0.009 ± 0.001 | 0.028 ± 0.004 | 0.007 ± 0.001 |
| DSA    | β-D-GlcNAc, (GlcNAcβ1-4) <sub>n</sub> , Galβ1-4GlcNAc                                                                                           | 0.088 ± 0.029 | 0.033 ± 0.007 | 0.203 ± 0.011 | 0.023 ± 0.004 | 0.019 ± 0.002 |
| SBA    | □α- or β-linked terminal GalNAc, (GalNAc) <sub>n</sub> , GalNAcα1-3Gal, blood-group A                                                           | 0.016 ± 0.008 | 0.018 ± 0.001 | 0.008 ± 0.002 | 0.018 ± 0.001 | 0.008 ± 0.002 |
| VVA    | terminal GalNAc, GalNAcα-Ser/Thr(Tn), GalNAcα1-3Gal                                                                                             | 0.019 ± 0.007 | 0.031 ± 0.007 | 0.021 ± 0.003 | 0.033 ± 0.006 | 0.014 ± 0.003 |
| NPA    | High-Mannose, Manα1-6Man                                                                                                                        | 0.017 ± 0.008 | 0.036 ± 0.012 | 0.018 ± 0.003 | 0.036 ± 0.007 | 0.013 ± 0.002 |
| PSA    | Fucα-1,6GlcNAc, α-D-Man, α-D-Glc                                                                                                                | 0.017 ± 0.007 | 0.019 ± 0.003 | 0.013 ± 0.001 | 0.021 ± 0.002 | 0.010 ± 0.002 |
| ACA    | Galβ1-3GalNAcα-Ser/Thr (T antigen), sialyl-T(ST) tissue staining patterns are markedly different than those obtained with either PNA or Jacalin | 0.101 ± 0.013 | 0.036 ± 0.009 | 0.115 ± 0.012 | 0.021 ± 0.002 | 0.218 ± 0.003 |
| WGA    | Multivalent Sia and (GlcNAc) <sub>n</sub>                                                                                                       | 0.039 ± 0.021 | 0.052 ± 0.010 | 0.026 ± 0.001 | 0.063 ± 0.006 | 0.018 ± 0.001 |

|         |                                                                                             |               |               |                |               |               |
|---------|---------------------------------------------------------------------------------------------|---------------|---------------|----------------|---------------|---------------|
| UEA-I   | Fuca1-2Galβ1-4Glc(NAc)                                                                      | 0.010 ± 0.001 | 0.024 ± 0.007 | /              | 0.021 ± 0.005 | 0.003 ± 0.001 |
| PWM     | Oligomers of β(1,4)-linked<br>N-acetyl-D-glucosamine, N-acetyllactosamine                   | 0.021 ± 0.009 | 0.033 ± 0.007 | 0.023 ± 0.002  | 0.033 ± 0.000 | 0.016 ± 0.003 |
| MAL-I   | Galβ-1,4GlcNAc                                                                              | 0.024 ± 0.011 | 0.029 ± 0.002 | 0.011 ± 0.002  | 0.019 ± 0.001 | 0.012 ± 0.003 |
| GNA     | High-Mannose, □ Manα1-3Man                                                                  | 0.014 ± 0.006 | 0.033 ± 0.007 | /              | 0.047 ± 0.004 | 0.011 ± 0.002 |
| BPL     | Galβ1-3GalNAc, Terminal GalNAc                                                              | 0.004 ± 0.001 | 0.015 ± 0.003 | 0.016 ± 0.007  | 0.016 ± 0.001 | 0.283 ± 0.058 |
| PHA-E+L | Bisecting GlcNAc, bi-antennary N-glycans, tri-<br>and tetra-antennary complex-type N-glycan | 0.004 ± 0.004 | 0.019 ± 0.006 | /              | 0.022 ± 0.004 | 0.002 ± 0.002 |
| SNA     | Sia2-6Gal/GalNAc                                                                            | 0.024 ± 0.009 | 0.021 ± 0.005 | 0.0234 ± 0.003 | 0.019 ± 0.001 | 0.019 ± 0.003 |

<sup>a</sup>Normalized fluorescent intensities (NFI) obtained for three repeated slides were averaged and its SD was counted; /, negative signals. DN, diabetic nephropathy; MN, membranous nephropathy; MPGN, mesangial proliferative glomerulonephritis; IgAN, IgA nephropathy; FSGS, Focal Segmental Glomerular Sclerosis.

**Table S2A The signal pathways showed enriched in proteins that increased or unique to in DN**

| Term | Count | P Value | Genes | Fold Enrichment |
|------|-------|---------|-------|-----------------|
|------|-------|---------|-------|-----------------|

|                                      |   |            |                                                                                                                                                        |             |
|--------------------------------------|---|------------|--------------------------------------------------------------------------------------------------------------------------------------------------------|-------------|
| Focal adhesion                       | 8 | 3.69E-05   | P35445, G3N126, E1BB91, G3N3E4, F2X2F2, F2X2F3, F2X2F0, F2X2F1, F1N169, A1XEA1, F1N789, P07589, Q2TA49, F1MDH3, G5E5A9, Q0II79, B8Y9T0, B8Y9S9, Q0VCE6 | 8.101495726 |
| ECM-receptor interaction             | 5 | 6.45E-04   | P35445, A1XEA1, G3N126, P07589, E1BB91, O18738, G3N3E4, G5E5A9, F1MER7, F1N7D7, B8Y9T0, B8Y9S9                                                         | 12.10568327 |
| Leukocyte transendothelial migration | 4 | 0.01711884 | A7MBB0, F1N789, Q9GKR2, Q9GKR3, Q2TA49, Q0VCE6                                                                                                         | 7.080298786 |

8

**Table S2B The signal pathways showed enriched in proteins that increased or unique to NDRD**

| <b>Term</b>                         | <b>Count</b> | <b>P Value</b> | <b>Genes</b>                                                       | <b>Fold Enrichment</b> |
|-------------------------------------|--------------|----------------|--------------------------------------------------------------------|------------------------|
| Complement and coagulation cascades | 4            | 9.03E-04       | F1MJ12, Q0VCX1, F1N4M7, G3X7A5, A0A0F6QNP7, Q32PI4, P34955, Q2UVX4 | 19.51866152            |
| Hypertrophic cardiomyopathy (HCM)   | 4            | 0.001132629    | P18341, Q5KR47, P63258, A6QR15, Q0VBX6, E1BNK3                     | 18.0547619             |
| Dilated cardiomyopathy              | 4            | 0.001396655    | P18341, Q5KR47, P63258, A6QR15, Q0VBX6, E1BNK3                     | 16.79512735            |
